# Supplementary material for: Transcriptome and Regulatory Network Analyses of CD19-CAR-T Immunotherapy for B-ALL
Source: PubMed Central journal article supplement (PMC6620363; doi:10.1016/j.gpb.2018.12.008), 2019-06-13

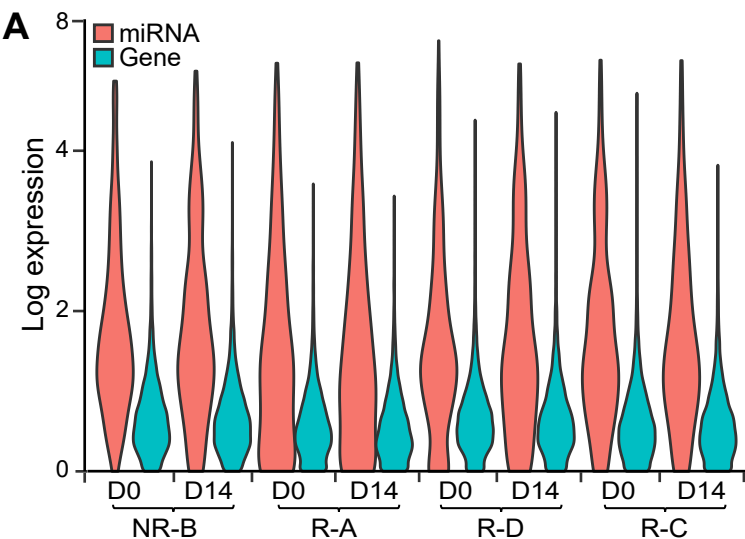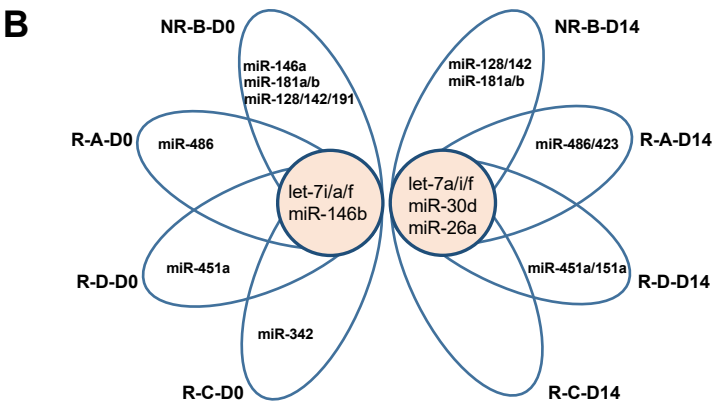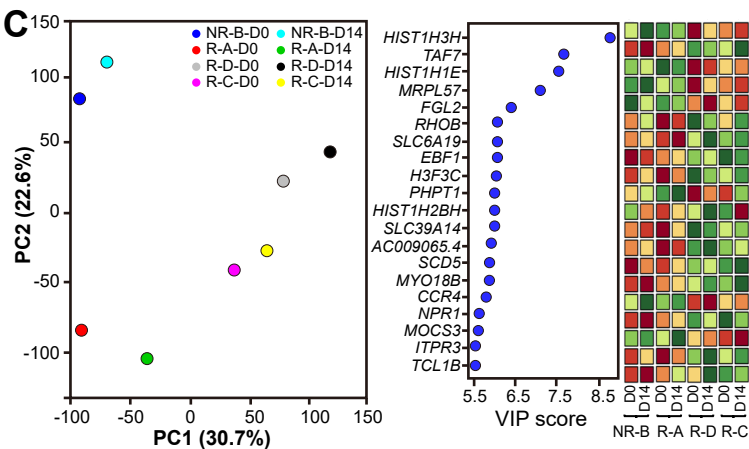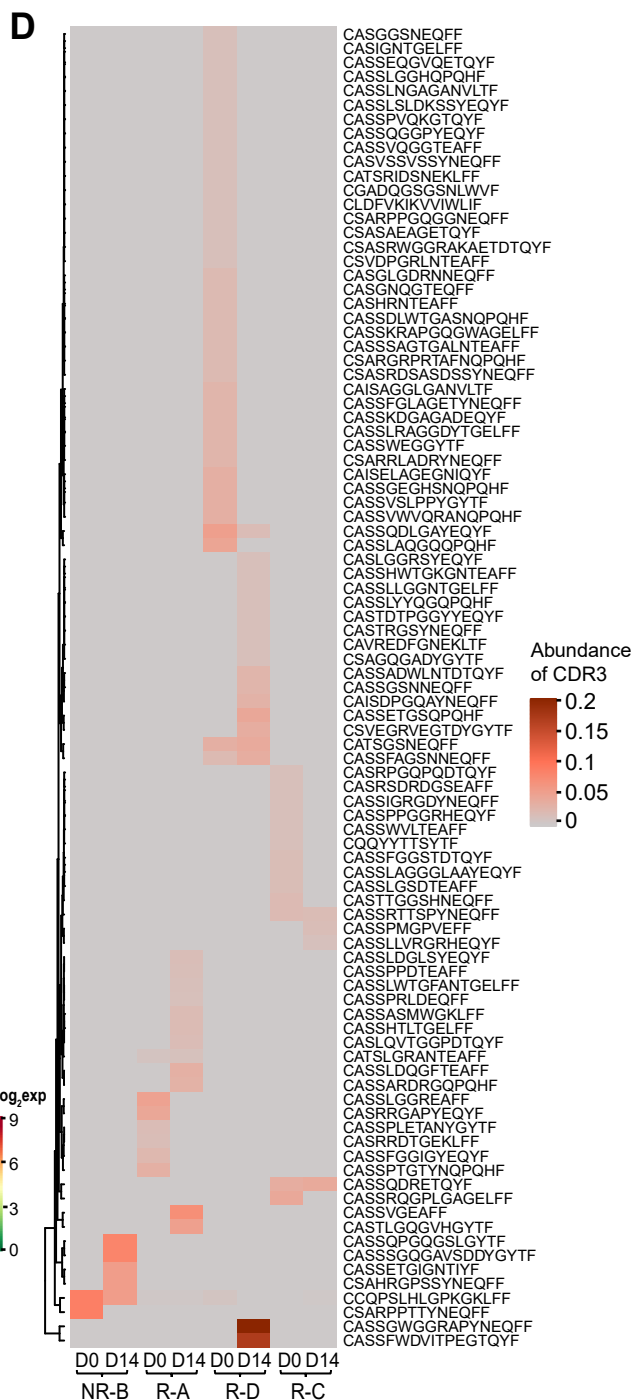

Supplement: mmc4.pdf [file mmc4.pdf]
